# Supplementary material
Source: publisher figshare collection journal article supplement (https://gsajournals.figshare.com/ndownloader/files/26786012)
Supplement: Supplementary file 1 [file 26786012]

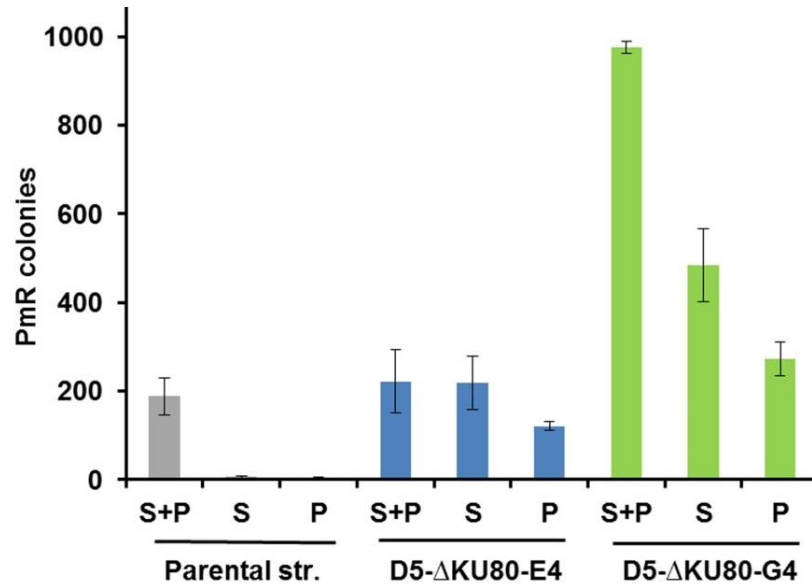

**Figure S5** Efficiency of the homology directed mut-*aphVIII* repair upon CRISPR/SpCas9-induced double-strand breaks through oligonucleotides in the parental strain and its KU80 deficient mutants. Efficiency of repair is presented as the number of PmR clones obtained by electroporation of cells with *EMX1* mut-*aphVIII* SpCas9 RNP and either single-stranded protospacer strand (P) or spacer strand (S) repair templates or their mixture including spacer ssODN + protospacer ssODN (S+P) in the parental CC3403-D5 strain and mutants D5-ΔKU80-E4 and D5-ΔKU80-G4. In all experiments, the number of cells was counted before plating, and the same number of cells was plated on TAP medium supplemented with Pm, 10 μg / ml. Error bars represent SEM (n = 3 separate experiments for each category).
